# Supplementary material
Source: publisher site journal article supplement (https://www.spandidos-publications.com/2163/downloadSupplementary)

Figure S1. Wound healing assay was used to examine the cell migration in miR-NC/miR-454-3p mimics/miR-454-3p mimics+IGF2BP1-transfected TE-1 cells, as well as NC-inh/miR-454-3p inh/miR-454-3p inh+sh-IGF2BP1-transfected TE-8 cells.

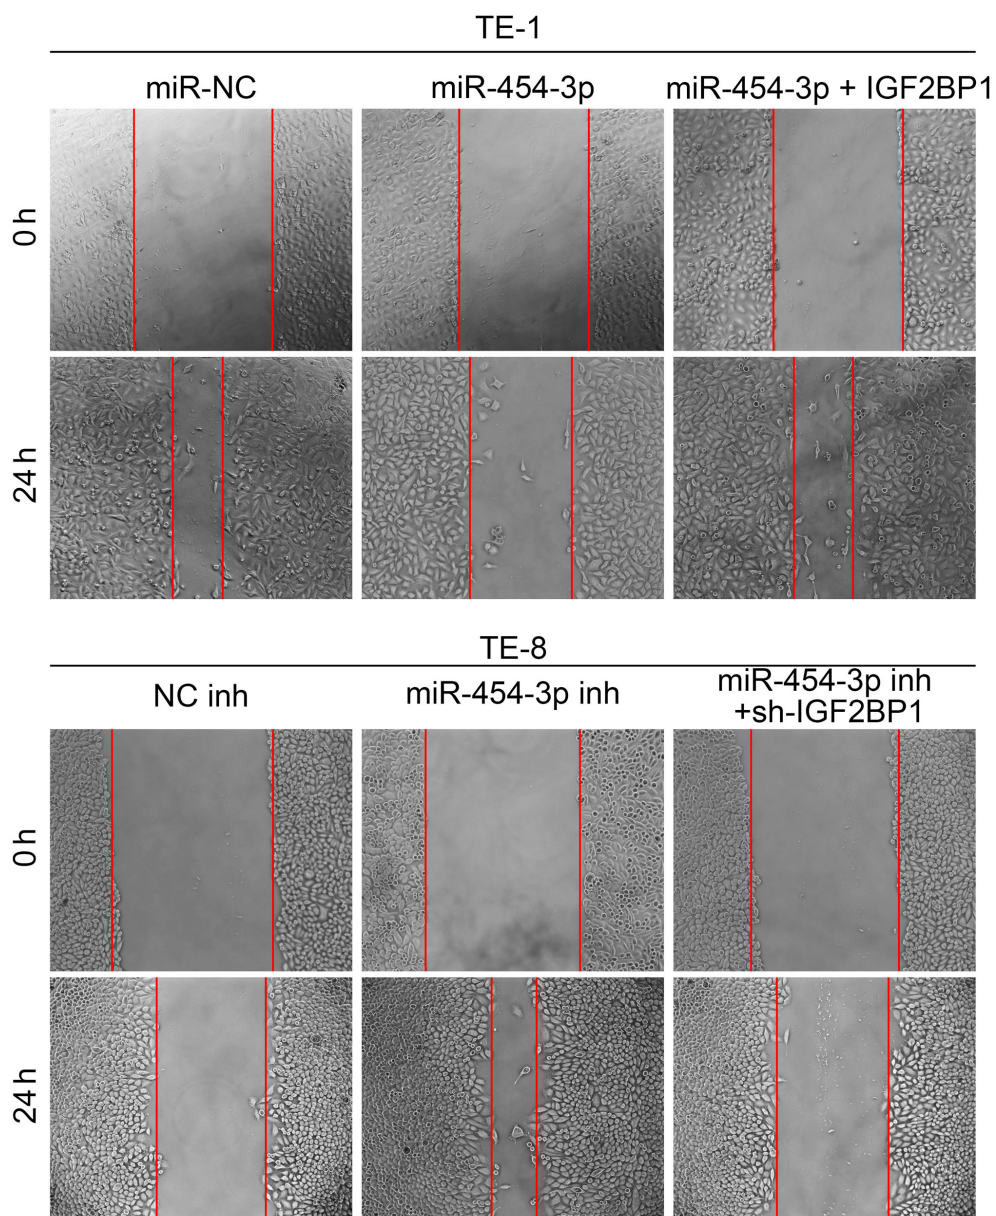

Supplement: Supplementary file 1 [file downloadSupplementary]
